# Supplementary material for: Cytosolic delivery of membrane-penetrating QDs into T cell lymphocytes: implications in immunotherapy and drug delivery
Source: Royal Society of Chemistry journal article supplement (doi:10.1039/d0nr08362c), 2021-01-01
Supplement: d0nr08362c1.pdf [file d0nr08362c1.pdf]

Supplementary Information for

**Cytosolic delivery of membrane-penetrating QDs into T cell lymphocytes: implications in immunotherapy and drug delivery**

*Haoran Jing*<sup>1</sup>, *Marcell Pálmai*<sup>1</sup>, *Badeia Saed*<sup>1</sup>, *Anne George*<sup>2</sup>, *Preston T. Snee*<sup>1</sup>, and *Ying S. Hu*<sup>1,\*</sup>

1. Department of Chemistry, College of Liberal Arts and Sciences, University of Illinois at Chicago, Chicago, IL, 60607-7061

2. Department of Oral Biology, College of Dentistry, University of Illinois at Chicago, Chicago, IL, 60612-7211

**This PDF file includes:**

Supplementary Figures S1 to S6  
Legends for Supplementary Videos S1, S2

**Other supplementary materials for this manuscript include the following:**

Supplementary Videos S1, S2

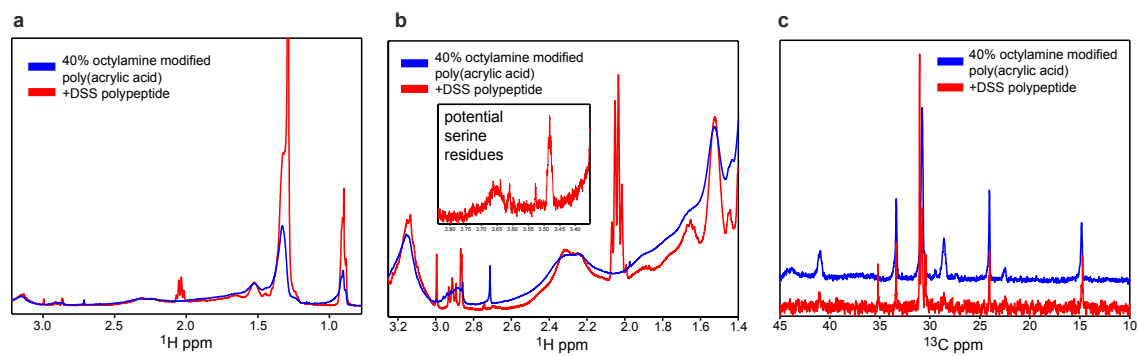

**Supplementary Figure 1.**  $^1\text{H}$  and  $^{13}\text{C}$  NMR reveal additional features and sharper resonances for octylamine modified polyacrylic acid that was functionalized with DSS peptide.

**a**

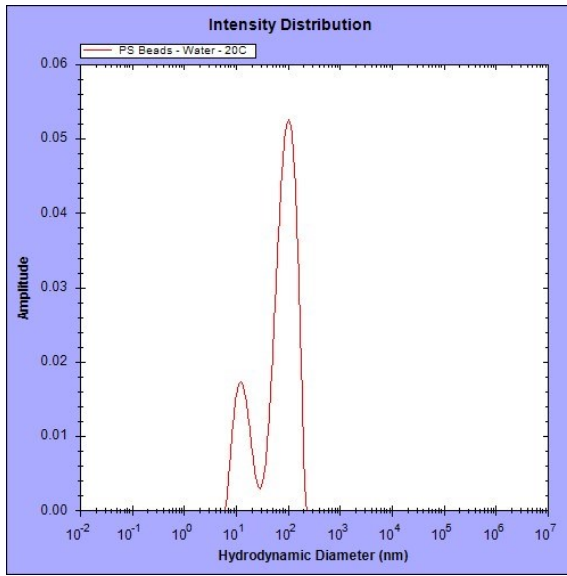

**b**

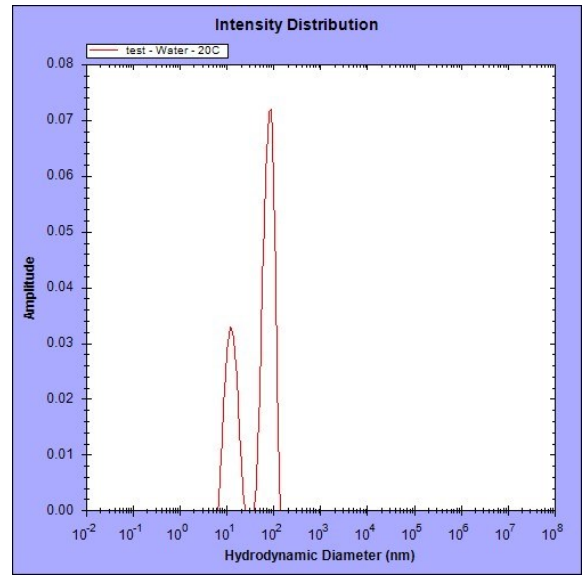

**Supplementary Figure 2.** Dynamic light scattering (DLS) results of DSS-QDs (a) and Control-QDs (b).

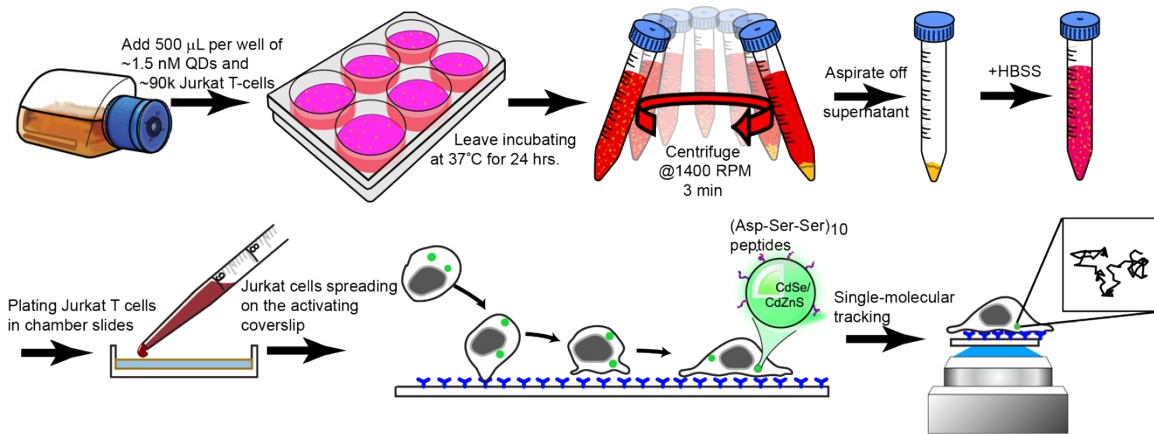

**Supplementary Figure 3.** Schematic representation of the T cell incubation with QDs, subsequent immobilization, and visualization on the activating surface coated with antibodies.

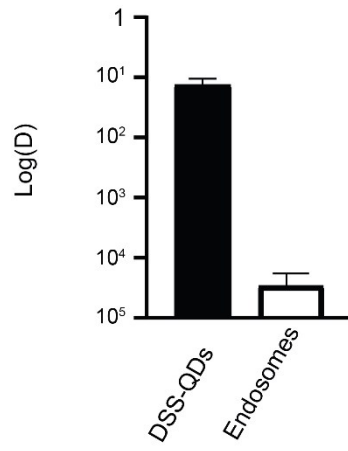

**Supplementary Figure 4** Diffusion coefficient  $\log_{10}$  value of the diffusion coefficient  $D$  in  $\mu\text{m}^2/\text{s}$  for single DSS-QDs and endosomes.

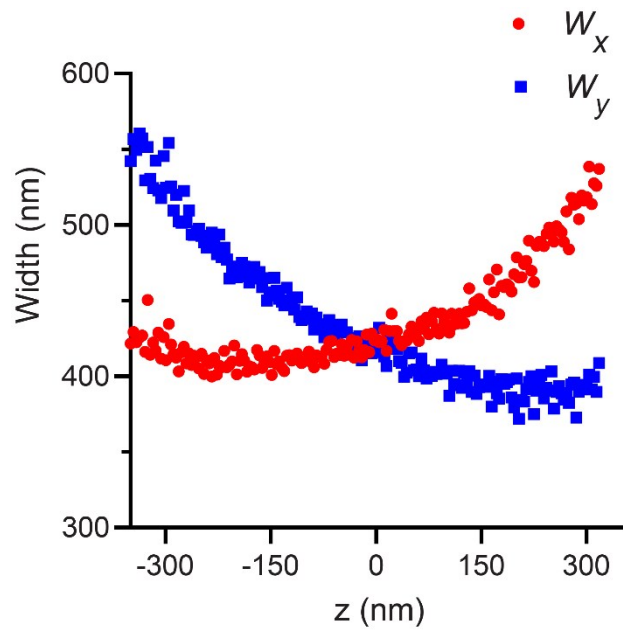

**Supplementary Figure 5** Calibration curve of image widths  $w_x$  and  $w_y$  as a function of  $z$  obtained from single TetraSpeck™ microspheres.

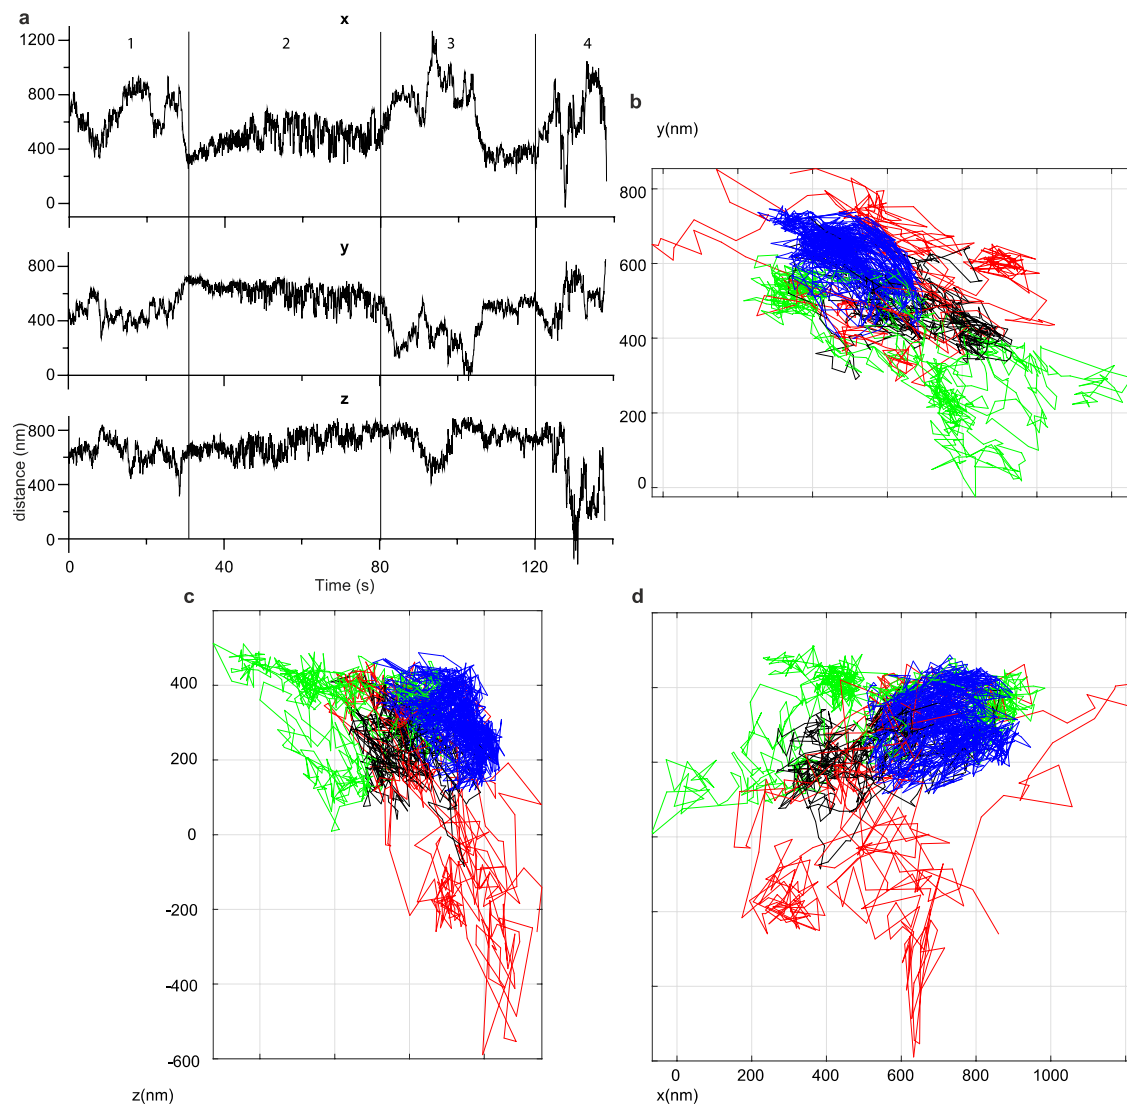

**Supplementary Figure 6.** Single-particle positions for each Cartesian coordinate axis as a function of time. **a.** 3D trajectories of the QD. **b-d.** The xy, yz, xz view of 3-D trajectory; region 1 in black, region 2 in blue, region 3 in green, and region 4 in red from a.

**Supplementary Video 1 (separate file).** TIRF video of a QD-laden T cell landing and immobilizing on the activating surface, 10x sped up from real time.

**Supplementary Video 2 (separate file).** 3D single-particle tracking showing DSS-QD internalization into a T cell, 10x sped up from real time.
